# Supplementary material
Source: PubMed Central journal article supplement (PMC6258919)
Supplement: ba024489-suppl1.pdf [file ba024489-suppl1.pdf]

**Supplement 1: Panel and Systematic Review Team Membership**

**Table:** Panel Members

| <b>ASH Guideline Panel on Prevention of Diagnosis of VTE</b> |                    |                                  |
|--------------------------------------------------------------|--------------------|----------------------------------|
| 1                                                            | Adam Cuker         | Chair, hematologist              |
| 2                                                            | Nancy Santesso     | Vice-chair, methodologist        |
| 3                                                            | Gowthami Arepally  | Hematologist                     |
| 4                                                            | Beng Chong         | Hematologist                     |
| 5                                                            | Douglas Cines      | Hematologist, internal medicine  |
| 6                                                            | Andreas Greinacher | Transfusion medicine, hemostasis |
| 7                                                            | Yves Gruel         | Hematologist                     |
| 8                                                            | Lori-Ann Linkins   | Hematologist, methodologist      |
| 9                                                            | Stephen Rodner     | Patient Representative           |
| 10                                                           | Sixten Selleng     | Anesthesia, hemostasis           |
| 11                                                           | Theodore Warkentin | Hematologist                     |
| 12                                                           | Ashleigh Wex       | Patient Representative           |

**Table:** McMaster GRADE Centre Researchers Contributing to Evidence Syntheses

| <b>McMaster GRADE Centre Researchers</b> |                   |
|------------------------------------------|-------------------|
| 1                                        | Rebecca L. Morgan |
| 2                                        | Arnav Agarwal     |
| 3                                        | Elie Akl          |
| 4                                        | Vahid Ashoorion   |
| 5                                        | Tejan Baldeh      |
| 6                                        | Sara Balduzzi     |
| 7                                        | Angela Barbara    |
| 8                                        | Housne Begum      |
| 9                                        | Meha Bhatt        |
| 10                                       | Cody Braun        |
| 11                                       | Rana Charide      |
| 12                                       | Rachel Couban     |
| 13                                       | Carlos Cuello     |
| 14                                       | Andrea Darzi      |
| 315                                      | Chengyi Ding      |
| 416                                      | Itziar Etxeandia  |
| 17                                       | Ivan Flores       |
| 18                                       | Naghmeh Foroutan  |
| 19                                       | Laura Fullerton   |
| 20                                       | Himmat Grewal     |
| 21                                       | Mira Hammoud      |

American Society of Hematology Guidelines for Management of Venous Thromboembolism: Heparin Induced Thrombocytopenia

|    |                        |
|----|------------------------|
| 22 | Ariel Izcovich         |
| 23 | Samer Karam            |
| 24 | Rasha Khatib           |
| 25 | Tamara Lotfi           |
| 26 | Nina Martinez          |
| 27 | Carolina Mendoza       |
| 28 | Gian Paolo Morgano     |
| 29 | Rami Morsi             |
| 30 | Reem Mustafa           |
| 31 | Ignacio Neumann        |
| 32 | Robby Nieuwlaat        |
| 33 | Ignacio Pineda         |
| 34 | Yasir Rehman           |
| 35 | John Riva              |
| 36 | Francisca Rodriguez    |
| 37 | Yetiani Roldan Benitez |
| 38 | Stephanie Ross         |
| 39 | Chen Ru                |
| 40 | Nicole Schwab          |
| 41 | Apig Tcholakian        |
| 42 | Matt Ventresca         |
| 43 | Reem Waziry            |
| 44 | Wojtek Wiercioch       |
| 45 | Juan Jose Yepes-Nunez  |
| 46 | Yuan Zhang             |
| 47 | Yuqing Zhang           |
