# Supplementary material
Source: PubMed Central journal article supplement (PMC6258919)
Supplement: ba024489-suppl4.pdf [file ba024489-suppl4.pdf]

### Supplement 4: Search Strategies

Recommendations 1-7: Diagnosis and treatment of persons at risk of or diagnosed with HIT

| <b>OVERVIEW</b>                                          |                                                                                                                                                                                                                                                                                                                                                                                              |
|----------------------------------------------------------|----------------------------------------------------------------------------------------------------------------------------------------------------------------------------------------------------------------------------------------------------------------------------------------------------------------------------------------------------------------------------------------------|
| Interface:                                               | Ovid                                                                                                                                                                                                                                                                                                                                                                                         |
| Database:                                                | Medline, Medline In-Process & Other Non-Indexed Citations (1946-present), Embase (1974-present), Cochrane Central Register of Controlled Trials (CENTRAL)                                                                                                                                                                                                                                    |
| Study Types:                                             | Randomized controlled trials and non-randomized studies                                                                                                                                                                                                                                                                                                                                      |
| <b>Search Strategy: search terms [number of results]</b> |                                                                                                                                                                                                                                                                                                                                                                                              |
| 1.                                                       | ((hit or hitt) and (prothromb* or thromb* or heparin*)).tw.                                                                                                                                                                                                                                                                                                                                  |
| 2.                                                       | remove duplicates from 1                                                                                                                                                                                                                                                                                                                                                                     |
| 3.                                                       | ((thrombocytopaen* or thrombocytopen*) adj2 Heparin).tw.                                                                                                                                                                                                                                                                                                                                     |
| 4.                                                       | 2 or 3                                                                                                                                                                                                                                                                                                                                                                                       |
| 5.                                                       | 4 and anticoagulant*.mp.                                                                                                                                                                                                                                                                                                                                                                     |
| 6.                                                       | remove duplicates from 5                                                                                                                                                                                                                                                                                                                                                                     |
| 7.                                                       | 4 not 5                                                                                                                                                                                                                                                                                                                                                                                      |
| 8.                                                       | remove duplicates from 7                                                                                                                                                                                                                                                                                                                                                                     |
| 9.                                                       | 6 or 8                                                                                                                                                                                                                                                                                                                                                                                       |
| 10.                                                      | (4-hydroxycoumarin or acenocoumarol or coumadin or coumatetralyl or dicoumarol or difenacoum or Diphenadione or ethyl-biscoumacetate or Falithrom or fluindione or Jantoven Marcoumar or Marcumar or nicoumalone or phenindione or phenprocoumon or phepromaron or Racumi or sinthrome or Sintrom or Tiocloamarol or warfarin).mp.                                                           |
| 11.                                                      | (Dermatan Sulfate or Mistral or Venorix).mp.                                                                                                                                                                                                                                                                                                                                                 |
| 12.                                                      | (doac* or noac* or vka).mp.                                                                                                                                                                                                                                                                                                                                                                  |
| 13.                                                      | (apixaban or argatrovan or BAY 59-7939 or Betrixaban or BIBR-953 or BIBR-953ZW or Bivalirudin or BMS-562247 or dabigatran or etexilate or Darexaban or Desirudin or DU-176 or DU-176b or Edoxaban or Eliquis or exanta or Iprivask or Lepirudin or lixiana or Melagatran or Otamixaban or pradax or pradaxa or Razaxaban or rivaroxaban or Savaysa or Xarelto or ximelagatran or YM 150).mp. |
| 14.                                                      | (Fondaparinux or Arixtra).mp.                                                                                                                                                                                                                                                                                                                                                                |
| 15.                                                      | (Argatroban or Danaparoid or Fondaparinux or Dextran or Bivalirudin or iloprost).mp.                                                                                                                                                                                                                                                                                                         |
| 16.                                                      | or/10-15                                                                                                                                                                                                                                                                                                                                                                                     |
| 17.                                                      | 9 and 16                                                                                                                                                                                                                                                                                                                                                                                     |

American Society of Hematology Guidelines for Management of Venous Thromboembolism: Diagnosis of Venous Thromboembolism

Recommendations 8.1 and 8.2: Emergency identification for persons with HIT

| <b>OVERVIEW</b>                                          |                                                                                             |
|----------------------------------------------------------|---------------------------------------------------------------------------------------------|
| Interface:                                               | Ovid                                                                                        |
| Database:                                                | Medline, and Medline In-Process & Other Non-Indexed Citations (1946-present)                |
| Study Types:                                             | Randomized controlled trials and non-randomized studies                                     |
| <b>Search Strategy: search terms [number of results]</b> |                                                                                             |
| 1.                                                       | (Alert adj1 card\$1).mp. [mp=ti, ab, hw, tn, ot, dm, mf, dv, kw, nm, kf, px, rx, ui]        |
| 2.                                                       | exp emergency health service/                                                               |
| 3.                                                       | medical alert\$.mp.                                                                         |
| 4.                                                       | exp hospital information system/                                                            |
| 5.                                                       | alert bracelet\$.mp.                                                                        |
| 6.                                                       | electronic tag\$.mp.                                                                        |
| 7.                                                       | exp patient safety/                                                                         |
| 8.                                                       | patient safety.mp. or patient safety/                                                       |
| 9.                                                       | (medic-alert or medicalert).mp. [mp=ti, ab, hw, tn, ot, dm, mf, dv, kw, nm, kf, px, rx, ui] |
| 10.                                                      | 7 or 8                                                                                      |
| 11.                                                      | 1 or 2 or 3 or 4 or 5 or 6 or 9 or 10                                                       |

| <b>OVERVIEW</b>                                          |                                                                                                       |
|----------------------------------------------------------|-------------------------------------------------------------------------------------------------------|
| Interface:                                               | Ovid                                                                                                  |
| Database:                                                | Embase                                                                                                |
| Study Types:                                             | Randomized controlled trials                                                                          |
| <b>Search Strategy: search terms [number of results]</b> |                                                                                                       |
| 1.                                                       | exp Emergency Medical Tags/                                                                           |
| 2.                                                       | exp Patient Identification Systems/                                                                   |
| 3.                                                       | Patient Identification System\$.mp.                                                                   |
| 4.                                                       | 2 or 3                                                                                                |
| 5.                                                       | (medical adj1 alert\$.mp. [mp=ti, ab, hw, tn, ot, dm, mf, dv, kw, nm, kf, px, rx, ui]                 |
| 6.                                                       | (Alert adj1 card\$1).mp. [mp=ti, ab, hw, tn, ot, dm, mf, dv, kw, nm, kf, px, rx, ui]                  |
| 7.                                                       | (alert adj1 bracelet\$.mp. [mp=ti, ab, hw, tn, ot, dm, mf, dv, kw, nm, kf, px, rx, ui]                |
| 8.                                                       | (equipment and supplies).mp. [mp=ti, ab, hw, tn, ot, dm, mf, dv, kw, nm, kf, px, rx, ui]              |
| 9.                                                       | (medical adj1 bracelet).mp. [mp=ti, ab, hw, tn, ot, dm, mf, dv, kw, nm, kf, px, rx, ui]               |
| 10.                                                      | (medic\$ adj2 bracelet\$ adj2 alert\$.mp. [mp=ti, ab, hw, tn, ot, dm, mf, dv, kw, nm, kf, px, rx, ui] |
| 11.                                                      | (medic-alert or medicalert).mp. [mp=ti, ab, hw, tn, ot, dm, mf, dv, kw, nm, kf, px, rx, ui]           |
| 12.                                                      | 1 or 2 or 3 or 4 or 5 or 6 or 7 or 8 or 9 or 10 or 11                                                 |

| <b>OVERVIEW</b>                                          |                                                                        |
|----------------------------------------------------------|------------------------------------------------------------------------|
| Interface:                                               | Cochrane Library                                                       |
| Databases:                                               | Cochrane Central Register of Controlled Trials (CENTRAL)               |
| Study Types:                                             | Randomized controlled trials                                           |
| <b>Search Strategy: search terms [number of results]</b> |                                                                        |
| #1                                                       | MeSH descriptor: [Patient Identification Systems] explode all trees 18 |
| #2                                                       | medical adj1 alert\$ 56                                                |
| #3                                                       | Alert adj1 card\$1 0                                                   |

American Society of Hematology Guidelines for Management of Venous Thromboembolism: Diagnosis of Venous Thromboembolism

```
#4 alert adj1 bracelet$ 1
#5 medical adj1 bracelet 1
#6 medic$ adj2 bracelet$ adj2 alert$ 0
#7 Emergen$ Medical Tag$ 0
#8 Medical Tag$ 159
#9 medicalalert 0
#10 medic-alert 0
#11 Patient Identification System$ 5389
#12 MeSH descriptor: [Equipment and Supplies] explode all trees 43241
#13 #2 or #3 or #4 or #5 or #6 or #7 or #8 or #9 or #10 48277
#14 MeSH descriptor [Thrombocytopenia] explode all trees 983
#15 thrombocytopen* 5831
#16 #14 or #15 5860
#17 thromb* or prothromb* or heparin* or HIT or HITT or acute or secondary or isolated 176789
#18 #16 or #17 5845
#19 heparin-induced adj thrombocytopenia 15
#20 heparin adj2 thrombocytopenia 19
#21 heparin-induced thrombocytopenia 221
#22 acute adj3 thrombocytopenia 79
#23 isolated adj thrombocytopenia 26
#24 isolated thrombocytopenia 136
#25 #18 or #19 or #20 or #21 or #22 or #23 or #24 5845
#26 #13 and #25 421
```
